# Supplementary material for: RPP30, a transcriptional regulator, is a potential pathogenic factor in glioblastoma
Source: Aging (Albany NY). 2020 Jul 23;12(16):16155–71. doi: 10.18632/aging.103596 (PMC7485703; doi:10.18632/aging.103596)
Supplement: Supplementary Table 1 [file aging-12-103596-s001..xlsx]

## Sheet: Sheet1
							Supplementary Table 1. Prognostic value of age-related genes in CGGA and TCGA databases.
ID	Variation	Gene Name	CGGA Database		TCGA Database
			HR	P-value	HR	P-value
1	Down in tumor & Down in Non-tumor	UBE4B	2.16445	0.0115841	0.730129	0.0186152
2	Up in tumor & Up in Non-tumor	ACAA1	0.640155	0.0263283	1.22474	0.16879
3	Down in tumor & Down in Non-tumor	NRBF2	0.670222	0.0401476	0.996752	0.981659
4	Down in tumor & Down in Non-tumor	DCP2	2.03614	0.046717	0.868303	0.464373
5	Down in tumor & Down in Non-tumor	RPP30	0.476362	0.0496808	0.658423	0.00586139
6	Up in tumor & Up in Non-tumor	HOXA3	1.16088	0.055133	1.06378	0.342754
7	Up in tumor & Down in Non-tumor	PRNP	0.637647	0.0564689	1.28097	0.0533213
8	Down in tumor & Up in Non-tumor	DHTKD1	0.583575	0.0617775	0.790945	0.181711
9	Down in tumor & Down in Non-tumor	IDI1	0.761146	0.0618133	0.9433	0.504325
10	Up in tumor & Up in Non-tumor	SLC2A4RG	1.41334	0.0703202	1.09842	0.515021
11	Down in tumor & Up in Non-tumor	RPL19	0.568101	0.0716882	0.668185	0.0296908
12	Up in tumor & Up in Non-tumor	CD72	1.19061	0.0803424	0.961486	0.513403
13	Down in tumor & Up in Non-tumor	CTBP2	0.600568	0.0808116	0.702218	0.0453515
14	Down in tumor & Down in Non-tumor	PIK3CA	0.767058	0.0852004	1.10933	0.34748
15	Up in tumor & Up in Non-tumor	C9orf64	1.42135	0.106065	1.46087	0.00111615
16	Down in tumor & Down in Non-tumor	ASB13	0.632661	0.111869	0.678785	0.0165942
17	Up in tumor & Up in Non-tumor	OTOS	0.797992	0.114856	1.05437	0.273873
18	Up in tumor & Up in Non-tumor	CD163	1.10518	0.120458	1.12453	0.00495348
19	Up in tumor & Down in Non-tumor	MAP1LC3A	0.770138	0.120572	1.2588	0.00831563
20	Up in tumor & Down in Non-tumor	PSMG3	1.3127	0.121107	1.17445	0.210894
21	Up in tumor & Down in Non-tumor	GRPEL2	1.60583	0.122501	0.75001	0.0425846
22	Down in tumor & Down in Non-tumor	ABI1	0.744382	0.127819	0.982012	0.881278
23	Up in tumor & Up in Non-tumor	CLRN3	0.769756	0.130572	1.19711	0.00598688
24	Up in tumor & Down in Non-tumor	TUBA1C	1.24098	0.131591	1.40017	0.001863
25	Down in tumor & Down in Non-tumor	TM9SF3	0.721144	0.137874	1.01453	0.904912
26	Down in tumor & Down in Non-tumor	CISD1	0.775414	0.148866	0.874427	0.200893
27	Up in tumor & Down in Non-tumor	PGK1	1.29476	0.169947	1.02975	0.773946
28	Down in tumor & Down in Non-tumor	PPA1	0.830671	0.18269	0.784126	0.0502508
29	Up in tumor & Up in Non-tumor	FCGR2B	1.11852	0.189738	1.09009	0.0412194
30	Up in tumor & Up in Non-tumor	SNTA1	0.857783	0.191652	1.08036	0.268791
31	Up in tumor & Up in Non-tumor	PHLDA3	0.849549	0.194084	1.27534	0.000684279
32	Down in tumor & Up in Non-tumor	USP54	0.824513	0.210727	0.937296	0.535758
33	Up in tumor & Up in Non-tumor	VASN	1.1204	0.219361	1.05218	0.326317
34	Down in tumor & Down in Non-tumor	SLK	0.725643	0.225776	0.910474	0.565367
35	Up in tumor & Up in Non-tumor	FLNC	1.09442	0.22722	1.04932	0.298989
36	Up in tumor & Up in Non-tumor	F11R	1.19051	0.230187	1.0976	0.301771
37	Down in tumor & Down in Non-tumor	STAM	0.797647	0.232764	0.788778	0.0896269
38	Down in tumor & Down in Non-tumor	PDCD11	1.37277	0.253621	0.823543	0.258169
39	Down in tumor & Down in Non-tumor	ATAD1	0.798096	0.263314	0.923813	0.473949
40	Down in tumor & Down in Non-tumor	VDAC2	0.826254	0.266374	0.721712	0.0607959
41	Up in tumor & Down in Non-tumor	ENTPD3	0.857372	0.268773	1.0235	0.701466
42	Up in tumor & Up in Non-tumor	PADI2	0.872177	0.274784	1.12501	0.0668123
43	Down in tumor & Up in Non-tumor	MBTD1	0.879982	0.277547	0.964953	0.624964
44	Down in tumor & Down in Non-tumor	ZRANB1	0.715075	0.279458	0.859427	0.316657
45	Up in tumor & Up in Non-tumor	CRB2	1.10934	0.283694	1.04977	0.394663
46	Up in tumor & Down in Non-tumor	U2AF1L4	0.775095	0.285418	1.07593	0.470267
47	Up in tumor & Down in Non-tumor	CDKL2	0.908292	0.287712	1.09387	0.175324
48	Up in tumor & Down in Non-tumor	PSEN2	0.792888	0.288873	1.13984	0.330574
49	Down in tumor & Up in Non-tumor	EEF1G	0.802406	0.292042	0.978891	0.893614
50	Up in tumor & Down in Non-tumor	RQCD1	1.34557	0.301866	1.06505	0.536606
51	Down in tumor & Down in Non-tumor	NUP50	1.38858	0.313047	1.28146	0.177148
52	Up in tumor & Down in Non-tumor	LRRC2	1.07845	0.316822	0.973115	0.555566
53	Down in tumor & Down in Non-tumor	ERCC6	1.33342	0.327844	0.777161	0.0839277
54	Up in tumor & Up in Non-tumor	ETV7	0.90982	0.328963	1.19388	0.00568959
55	Up in tumor & Up in Non-tumor	C21orf63	0.876192	0.332642	1.16633	0.0580794
56	Down in tumor & Up in Non-tumor	RPL10L	0.832875	0.342385	0.78022	0.0567868
57	Up in tumor & Up in Non-tumor	FIBIN	0.891162	0.352081	1.10278	0.175457
58	Up in tumor & Down in Non-tumor	NAPA	0.800125	0.361447	1.21277	0.0528865
59	Up in tumor & Up in Non-tumor	C4orf6	1.05299	0.369084	0.927911	0.313629
60	Up in tumor & Up in Non-tumor	TMBIM1	0.881968	0.377009	1.28165	0.00472822
61	Down in tumor & Down in Non-tumor	CUL2	0.87519	0.379124	0.778464	0.0961524
62	Up in tumor & Up in Non-tumor	TRIM14	0.835804	0.387582	1.28002	0.116836
63	Up in tumor & Up in Non-tumor	KIAA0495	0.838667	0.390135	1.18736	0.0821272
64	Down in tumor & Down in Non-tumor	HSPA14	1.18416	0.390562	0.750465	0.0100614
65	Down in tumor & Down in Non-tumor	SHOC2	0.860499	0.411113	1.07415	0.590879
66	Down in tumor & Down in Non-tumor	UBR1	0.794342	0.411439	0.87304	0.399293
67	Down in tumor & Up in Non-tumor	EPC1	1.2315	0.414216	0.815856	0.100052
68	Up in tumor & Up in Non-tumor	ISG20	1.10317	0.418357	1.30821	0.000730665
69	Down in tumor & Up in Non-tumor	DNMBP	0.876278	0.422844	1.02838	0.790456
70	Down in tumor & Up in Non-tumor	RPL23	1.28733	0.423517	0.636665	0.00792159
71	Down in tumor & Down in Non-tumor	CDC123	0.884927	0.426062	0.806563	0.12704
72	Down in tumor & Down in Non-tumor	MAPK8	0.859726	0.447749	0.730515	0.0342946
73	Down in tumor & Down in Non-tumor	TUBGCP4	0.856874	0.452611	0.72338	0.0461399
74	Down in tumor & Down in Non-tumor	PVRL3	0.93009	0.459274	1.06259	0.27333
75	Up in tumor & Down in Non-tumor	KCNMB2	0.925641	0.464712	1.06062	0.243122
76	Down in tumor & Down in Non-tumor	GDI2	0.883335	0.474635	0.638608	0.00101728
77	Down in tumor & Down in Non-tumor	HECTD2	0.849283	0.480091	0.871015	0.323116
78	Up in tumor & Up in Non-tumor	APLN	1.09238	0.480357	0.978437	0.759301
79	Up in tumor & Up in Non-tumor	MAOB	1.06218	0.488404	1.08243	0.11298
80	Up in tumor & Up in Non-tumor	NOTCH4	1.15365	0.503444	1.06682	0.619548
81	Up in tumor & Down in Non-tumor	CYB561	1.11188	0.525228	1.34698	0.00679956
82	Up in tumor & Down in Non-tumor	PAK6	1.08471	0.525248	1.445	0.00729751
83	Up in tumor & Down in Non-tumor	COQ10B	0.87001	0.52805	1.37144	0.00500846
84	Down in tumor & Down in Non-tumor	CCNY	0.863548	0.536459	1.10487	0.633708
85	Up in tumor & Down in Non-tumor	NRN1	1.07578	0.53707	1.00875	0.903318
86	Up in tumor & Down in Non-tumor	SLC27A4	0.888912	0.537107	1.35871	0.0183458
87	Up in tumor & Up in Non-tumor	EMP3	1.06228	0.542577	1.22389	0.0114038
88	Up in tumor & Up in Non-tumor	LRRC34	1.07921	0.54271	1.06779	0.419649
89	Up in tumor & Up in Non-tumor	ADSSL1	0.924385	0.566636	1.15048	0.0830577
90	Up in tumor & Up in Non-tumor	GYS1	0.894886	0.571183	1.07504	0.504806
91	Down in tumor & Down in Non-tumor	GPR158	0.939977	0.579097	0.916501	0.145138
92	Down in tumor & Up in Non-tumor	RPS24	0.888297	0.579864	0.724773	0.00885237
93	Up in tumor & Up in Non-tumor	SLC11A1	1.06111	0.582084	1.18304	0.0176816
94	Up in tumor & Up in Non-tumor	TPPP3	1.04274	0.583595	1.075	0.154544
95	Down in tumor & Up in Non-tumor	C10orf119	0.909507	0.585811	0.818923	0.169341
96	Down in tumor & Up in Non-tumor	DCLRE1C	1.152	0.587882	0.705177	0.0182744
97	Up in tumor & Up in Non-tumor	SSH3	0.876714	0.58972	1.19315	0.16947
98	Down in tumor & Down in Non-tumor	NUDT4	0.90338	0.590831	0.796459	0.038156
99	Up in tumor & Down in Non-tumor	ZNF134	0.851688	0.591771	0.966921	0.836274
100	Up in tumor & Down in Non-tumor	NUDCD3	0.854347	0.603062	1.4243	0.0246028
101	Down in tumor & Down in Non-tumor	PTPN4	0.879495	0.61578	0.850579	0.369433
102	Down in tumor & Up in Non-tumor	NOC3L	0.900095	0.618347	0.713132	0.0754937
103	Down in tumor & Down in Non-tumor	UBE3A	0.906287	0.623333	0.929607	0.653508
104	Up in tumor & Up in Non-tumor	SLC25A20	1.07731	0.624689	1.16608	0.12857
105	Down in tumor & Down in Non-tumor	DDX50	1.10028	0.627455	0.640562	0.0218566
106	Up in tumor & Up in Non-tumor	COL16A1	0.942969	0.632034	1.06599	0.272611
107	Up in tumor & Up in Non-tumor	EN1	1.03698	0.637402	1.0243	0.558674
108	Up in tumor & Down in Non-tumor	FAM110C	1.04043	0.638069	0.93627	0.353107
109	Down in tumor & Up in Non-tumor	RPS27	0.883304	0.648634	0.73601	0.044055
110	Up in tumor & Up in Non-tumor	DOCK6	1.07286	0.656166	1.06281	0.472923
111	Down in tumor & Down in Non-tumor	WAC	0.921565	0.65832	0.672765	0.0268475
112	Up in tumor & Down in Non-tumor	LRPAP1	0.934773	0.658967	1.75629	0.000126037
113	Up in tumor & Up in Non-tumor	C1orf88	1.0602	0.66543	1.04203	0.478764
114	Down in tumor & Down in Non-tumor	CALB1	0.975907	0.670946	1.01885	0.668148
115	Down in tumor & Up in Non-tumor	PABPC3	1.03984	0.680817	0.887022	0.306179
116	Down in tumor & Up in Non-tumor	DLG5	0.906156	0.68098	1.00625	0.959143
117	Up in tumor & Up in Non-tumor	INHBB	1.05427	0.691243	1.07481	0.254066
118	Up in tumor & Down in Non-tumor	SEC61G	1.02357	0.697577	1.03444	0.251604
119	Down in tumor & Down in Non-tumor	ZNF642	1.03477	0.70487	1.01031	0.840706
120	Down in tumor & Up in Non-tumor	TAF3	1.07922	0.709558	0.881959	0.297551
121	Up in tumor & Up in Non-tumor	MTCP1	1.05788	0.713769	0.935967	0.686431
122	Up in tumor & Up in Non-tumor	SERPING1	0.964938	0.716179	1.20031	0.0193687
123	Down in tumor & Down in Non-tumor	PRR3	1.11242	0.716964	0.910955	0.648875
124	Up in tumor & Up in Non-tumor	STAC2	1.03257	0.719992	1.06953	0.225479
125	Up in tumor & Down in Non-tumor	ABCG4	1.04071	0.73552	1.10042	0.448956
126	Down in tumor & Up in Non-tumor	PELI1	1.08681	0.737327	0.971853	0.787762
127	Up in tumor & Up in Non-tumor	SPATA22	1.05945	0.743029	1.02383	0.681204
128	Down in tumor & Up in Non-tumor	MLLT10	0.903931	0.747733	0.647426	0.0167547
129	Down in tumor & Down in Non-tumor	ATE1	0.942912	0.74987	0.84745	0.203489
130	Up in tumor & Up in Non-tumor	CLEC5A	1.02575	0.757488	1.30047	0.000111304
131	Down in tumor & Down in Non-tumor	CHCHD1	1.06073	0.776809	0.757721	0.0511063
132	Down in tumor & Up in Non-tumor	MGA	1.11952	0.789617	0.931878	0.703767
133	Up in tumor & Down in Non-tumor	SKAP2	0.975919	0.834572	1.08675	0.179849
134	Up in tumor & Down in Non-tumor	PROM1	0.981303	0.83484	0.936797	0.109966
135	Down in tumor & Down in Non-tumor	CACNB2	0.966705	0.839568	0.967953	0.767296
136	Up in tumor & Down in Non-tumor	YKT6	1.03496	0.84215	1.37049	0.0148352
137	Down in tumor & Down in Non-tumor	ATP5C1	0.963142	0.844799	0.749861	0.017324
138	Up in tumor & Up in Non-tumor	AGXT2L2	1.03884	0.85403	1.22393	0.115131
139	Down in tumor & Down in Non-tumor	GTPBP4	0.956643	0.8608	0.771457	0.0559032
140	Down in tumor & Up in Non-tumor	PABPC1	0.966254	0.862485	0.89452	0.35082
141	Down in tumor & Down in Non-tumor	NDN	0.987752	0.873308	1.02351	0.523576
142	Down in tumor & Down in Non-tumor	YME1L1	1.03404	0.874568	0.777561	0.102044
143	Down in tumor & Down in Non-tumor	CWF19L1	1.05527	0.874739	0.89275	0.345603
144	Down in tumor & Up in Non-tumor	KIF5B	1.02617	0.886744	0.931379	0.610008
145	Up in tumor & Up in Non-tumor	ALDH7A1	1.01651	0.889523	1.09876	0.272092
146	Up in tumor & Up in Non-tumor	PPM1M	1.03036	0.892023	1.28995	0.0153505
147	Down in tumor & Down in Non-tumor	TUSC3	1.01053	0.892039	0.933191	0.213578
148	Up in tumor & Up in Non-tumor	ANKRD35	0.989096	0.893586	1.05292	0.348929
149	Up in tumor & Up in Non-tumor	LSP1	1.01178	0.898352	1.33894	0.00910047
150	Down in tumor & Up in Non-tumor	RPL31	1.03505	0.901776	0.799917	0.0544158
151	Up in tumor & Down in Non-tumor	TMEM38A	0.980023	0.913712	0.963528	0.739763
152	Up in tumor & Up in Non-tumor	EGLN3	1.00888	0.930145	0.91773	0.229109
153	Up in tumor & Up in Non-tumor	EPS8L2	1.00771	0.941832	1.16572	0.0870162
154	Up in tumor & Up in Non-tumor	FGR	0.991923	0.950322	1.31952	0.0281987
155	Down in tumor & Up in Non-tumor	RPS17	1.01421	0.952027	0.847973	0.240237
156	Down in tumor & Down in Non-tumor	H2AFY2	0.993361	0.952536	0.838193	0.00816745
157	Up in tumor & Up in Non-tumor	PLEKHG1	1.00797	0.956677	1.16298	0.0268181
158	Down in tumor & Down in Non-tumor	TIMM23	0.993024	0.979639	0.729642	0.0625124
159	Up in tumor & Down in Non-tumor	AQP9	0.998855	0.983089	1.07914	0.0439258
160	Up in tumor & Up in Non-tumor	ADM	0.998511	0.983344	1.00822	0.837978
161	Up in tumor & Up in Non-tumor	OTUD4	1.00528	0.985827	1.10431	0.597368
162	Down in tumor & Up in Non-tumor	RPS4X	0.996121	0.986718	0.576988	0.000195244
163	Down in tumor & Up in Non-tumor	ENOSF1	1.00104	0.994098	1.04036	0.599277
